# Supplementary material for: Gene Expression at the Pluripotency Stage Predicts Pancreatic Endocrine Differentiation in iPSC Clones
Source: Research Square preprint supplement (doi:10.21203/rs.3.rs-8613101/v1), 2026-01-19
Supplement: Supplementary file 1 [file 58e9559f2e9ba4f3351b9887.xlsx]

## Sheet: 73DEGs_Gr1_Gr2
Symbol	GeneID	Description	log2FoldChange	pvalue	padj
GBX2	2637	gastrulation brain homeobox 2	-6.24578	3.71396e-07	6.75422e-05
ZFHX3	463	zinc finger homeobox 3	-5.53409	3.8252e-05	0.000749739
UTF1	8433	undifferentiated embryonic cell transcription factor 1	-5.51402	7.66426e-06	0.000313109
CNTFR	1271	ciliary neurotrophic factor receptor	-4.71946	2.34111e-06	0.000172072
CPT1A	1374	carnitine palmitoyltransferase 1A (liver)	-3.3641	2.77312e-07	6.75422e-05
NR5A2	2494	nuclear receptor subfamily 5_ group A_ member 2	-3.22578	4.59471e-07	6.75422e-05
BMP7	655	bone morphogenetic protein 7	-3.18337	7.53472e-07	8.49982e-05
DLL1	28514	delta-like 1 (Drosophila)	-2.97807	0.00198472	0.011102
DPPA3	359787	developmental pluripotency associated 3	-2.97653	0.000123683	0.00161612
NODAL	4838	nodal growth differentiation factor	-2.92752	4.11242e-05	0.000755657
MIXL1	83881	Mix paired-like homeobox	-2.87944	0.000647414	0.00543828
WNT3	7473	wingless-type MMTV integration site family_ member 3	-2.86939	0.000772622	0.00605736
DPPA5	340168	developmental pluripotency associated 5	-2.47206	0.000185175	0.00222211
CAV1	857	caveolin 1_ caveolae protein_ 22kDa	-2.05152	0.000929184	0.00700462
ROR2	4920	receptor tyrosine kinase-like orphan receptor 2	-2.03516	0.00137672	0.00899459
WNT3A	89780	wingless-type MMTV integration site family_ member 3A	-1.97423	0.00380457	0.016571
WNT5A	7474	wingless-type MMTV integration site family_ member 5A	-1.91331	0.000978959	0.00719378
GDF3	9573	growth differentiation factor 3	-1.87849	3.09268e-07	6.75422e-05
FOSL2	2355	FOS-like antigen 2	-1.83476	0.00416478	0.0176179
ID2	3398	inhibitor of DNA binding 2_ dominant negative helix-loop-helix protein	-1.7048	1.73343e-05	0.000464095
CHD3	1107	chromodomain helicase DNA binding protein 3	-1.53331	2.77496e-05	0.000619556
PRKCH	5583	protein kinase C_ eta	-1.45032	0.00292481	0.0136688
LAMB1	3912	laminin_ beta 1	-1.44899	1.97092e-05	0.000482877
FBN2	2201	fibrillin 2	-1.43944	0.000207305	0.00238458
HEG1	57493	heart development protein with EGF-like domains 1	-1.41519	1.42537e-05	0.000419059
SMAD3	4088	SMAD family member 3	-1.30001	0.000302446	0.00296397
PPP2R2C	5522	protein phosphatase 2_ regulatory subunit B_ gamma	-1.21106	0.000135256	0.00169214
KITLG	4254	KIT ligand	-1.15339	0.00131969	0.00873117
NANOG	79923	Nanog homeobox	-1.11045	1.41626e-05	0.000419059
AKT1	207	v-akt murine thymoma viral oncogene homolog 1	-1.10034	9.83166e-05	0.00137643
CKB	1152	creatine kinase_ brain	-1.0819	6.07546e-06	0.000291399
BMP4	652	bone morphogenetic protein 4	-1.07647	0.0158672	0.0493648
TGFBR3	7049	transforming growth factor_ beta receptor III	-1.03307	0.00163707	0.00992366
CASP3	836	caspase 3_ apoptosis-related cysteine peptidase	-0.941003	2.85042e-05	0.000619556
PRKCA	5578	protein kinase C_ alpha	-0.936797	0.000276244	0.00283242
SFN	2810	stratifin	-0.92071	0.00100321	0.00719378
FN1	2335	fibronectin 1	-0.866986	0.000214669	0.00238458
PRDM14	63978	PR domain containing 14	-0.865785	0.000421049	0.00386839
KIFC3	3801	kinesin family member C3	-0.796376	0.00519093	0.0206234
CDH11	1009	cadherin 11_ type 2_ OB-cadherin (osteoblast)	-0.763736	0.0125096	0.0417934
SOCS2	8835	suppressor of cytokine signaling 2	-0.759733	9.78364e-05	0.00137643
CACNA2D2	9254	calcium channel_ voltage-dependent_ alpha 2/delta subunit 2	-0.743058	0.00226105	0.0116877
CDK5	1020	cyclin-dependent kinase 5	-0.727174	0.000991862	0.00719378
CDKN1B	1027	cyclin-dependent kinase inhibitor 1B (p27_ Kip1)	-0.680364	0.00272929	0.0133735
MDK	4192	midkine (neurite growth-promoting factor 2)	-0.67099	7.7621e-05	0.00120108
GLS	2744	glutaminase	-0.6684	5.61791e-06	0.000291399
LAMC1	3915	laminin_ gamma 1 (formerly LAMB2)	-0.620401	0.000983232	0.00719378
ADAM19	8728	ADAM metallopeptidase domain 19	-0.591691	0.00801641	0.0285676
FBXW11	23291	F-box and WD repeat domain containing 11	0.610197	8.24698e-06	0.000313109
BCAR1	9564	breast cancer anti-estrogen resistance 1	0.646848	0.00771852	0.0276737
MECP2	4204	methyl CpG binding protein 2	0.647962	0.0157355	0.0492153
IFT140	9742	intraflagellar transport 140	0.654641	0.0103662	0.0354381
TUBA4A	7277	tubulin_ alpha 4a	0.665884	1.81534e-05	0.000464095
IRAK1	3654	interleukin-1 receptor-associated kinase 1	0.706455	0.00155235	0.00969636
CTNND2	1501	catenin (cadherin-associated protein)_ delta 2	0.713508	0.00559263	0.0217779
ITGA5	3678	integrin_ alpha 5 (fibronectin receptor_ alpha polypeptide)	0.724498	0.00200138	0.011102
GRAMD1B	57476	GRAM domain containing 1B	0.739783	0.00226598	0.0116877
BCAT2	587	branched chain amino-acid transaminase 2_ mitochondrial	0.811792	0.00158308	0.00969636
BUB1	699	BUB1 mitotic checkpoint serine/threonine kinase	0.847279	1.20256e-06	0.000101015
TGFBI	7045	transforming growth factor_ beta-induced_ 68kDa	1.00328	0.00295228	0.0136688
TGFB1	7040	transforming growth factor_ beta 1	1.0271	0.00314766	0.0142371
LOX	4015	lysyl oxidase	1.14876	0.0114669	0.0387504
RIMKLA	284716	ribosomal modification protein rimK-like family member A	1.18193	0.00140753	0.0090464
FYN	2534	FYN proto-oncogene_ Src family tyrosine kinase	1.23054	8.51998e-06	0.000313109
GLS2	27165	glutaminase 2 (liver_ mitochondrial)	1.40829	0.00258548	0.0129937
FZD7	8324	frizzled class receptor 7	1.43708	5.88239e-05	0.00101731
CAMK1	8536	calcium/calmodulin-dependent protein kinase I	1.46046	0.00554166	0.0217233
COL1A1	1277	collagen_ type I_ alpha 1	1.64115	0.000101586	0.00138913
ACBD7	414149	acyl-CoA binding domain containing 7	1.67015	0.000118602	0.00158495
IDO1	3620	indoleamine 2_3-dioxygenase 1	1.85945	8.67329e-07	8.49982e-05
AFP	174	alpha-fetoprotein	2.08146	0.00704048	0.0257131
TNNT2	7139	troponin T type 2 (cardiac)	2.25018	0.0152031	0.0485553
PDGFRB	5159	platelet-derived growth factor receptor_ beta polypeptide	2.63665	7.46174e-05	0.00119766
