# Supplementary material for: Gene Expression at the Pluripotency Stage Predicts Pancreatic Endocrine Differentiation in iPSC Clones
Source: Research Square preprint supplement (doi:10.21203/rs.3.rs-8613101/v1), 2026-01-19
Supplement: Supplementary file 2 [file ba56560058f230bddde74a86.xlsx]

## Sheet: Foglio1
Gene ID	Log2 fold change	std error (log2)	P-value
RASGRP2	-3.75	0.359	2.6e-09
MAP2	-3.67	0.5	5.83e-07
IDO1	-3.02	0.554	2.94e-05
PRDM14	-2.59	0.286	2.53e-08
THY1	-2.54	0.343	5.06e-07
WNT5A	-2.41	0.382	4.55e-06
SOX2	-2.37	0.381	5.76e-06
DNMT3B	-2.32	0.123	8.91e-14
FGF2	-2.27	0.437	5.03e-05
ATL1	-2.27	0.313	6.89e-07
CPT1A	-2.2	0.511	0.000374
TERT	-2.06	0.298	1.35e-06
ZFP42	-2.03	0.225	2.77e-08
CKMT1A/B	-2.01	0.392	6.11e-05
POU5F1	-1.93	0.339	1.67e-05
MYC	-1.82	0.274	2.32e-06
CDH11	-1.81	0.441	0.000619
JARID2	-1.77	0.175	4.55e-09
DPPA4	-1.72	0.149	4.89e-10
SFN	-1.7	0.265	3.72e-06
TUBA4A	-1.65	0.32	5.44e-05
PRKCA	-1.54	0.177	4.44e-08
NANOG	-1.53	0.316	0.000117
AASS	-1.44	0.184	2.3e-07
STAT3	-1.4	0.106	4.71e-11
GLI3	-1.32	0.118	8.49e-10
SCLY	-1.2	0.127	1.31e-08
PCNA	-1.16	0.112	3.29e-09
BUB1B	-1.1	0.0946	4.76e-10
CDC6	-1.07	0.106	4.5e-09
DUSP6	-1.02	0.309	0.0037
TFDP2	-1.01	0.128	2.01e-07
MCM3	-1	0.101	6.67e-09
FOXD3	-1	0.381	0.0165
MAD2L2	-0.994	0.103	9.42e-09
TTK	-0.992	0.0999	5.85e-09
BUB3	-0.991	0.0936	2.08e-09
CUL1	-0.986	0.0704	1.82e-11
AMD1	-0.935	0.0652	1.22e-11
CDC25A	-0.871	0.0681	8.63e-11
PARP1	-0.859	0.0482	2.53e-13
TGFBI	-0.833	0.266	0.00548
OAT	-0.829	0.0826	4.99e-09
ARNTL	-0.824	0.147	2.13e-05
INO80	-0.815	0.132	6.37e-06
SIRT1	-0.765	0.0564	3.21e-11
SOCS1	-0.762	0.158	0.000118
CDH1	-0.733	0.0875	8.43e-08
TP53	-0.729	0.117	5.28e-06
PIAS2	-0.724	0.102	1e-06
DNMT1	-0.723	0.0674	1.69e-09
ARHGEF9	-0.696	0.105	2.58e-06
GOT2	-0.693	0.0533	6.7e-11
APEX1	-0.686	0.0544	1.12e-10
DNMT3A	-0.681	0.0491	2.14e-11
SDC2	-0.679	0.145	0.000159
SUV39H2	-0.674	0.0921	6.15e-07
CASP3	-0.662	0.173	0.00114
TAF5	-0.657	0.115	1.62e-05
CCNB1	-0.643	0.063	3.8e-09
GIT1	-0.628	0.0653	9.88e-09
ACTL6A	-0.615	0.0521	3.41e-10
CCNA2	-0.613	0.0667	1.99e-08
LIN9	-0.604	0.0385	2.57e-12
ELOVL6	-0.603	0.0706	6.27e-08
CTNND2	-0.601	0.173	0.00254
EHMT2	-0.586	0.0538	1.32e-09
POLR1C	-0.585	0.0923	4.35e-06
RNF111	0.597	0.071	7.94e-08
GABARAP	0.601	0.0572	2.35e-09
RPS6KA3	0.605	0.108	2.07e-05
LAMP1	0.618	0.0599	3.14e-09
CDK5	0.626	0.146	0.000406
ETS1	0.627	0.123	6.36e-05
TEAD3	0.631	0.0908	1.29e-06
GNB1	0.644	0.063	3.75e-09
CPT2	0.646	0.0837	2.82e-07
HDAC1	0.656	0.0733	3.03e-08
REST	0.661	0.09	5.9e-07
CIR1	0.666	0.102	3.04e-06
PSENEN	0.676	0.0691	7.36e-09
F11R	0.683	0.0658	2.85e-09
CDK8	0.685	0.0788	4.8e-08
CASP9	0.686	0.128	3.76e-05
PAFAH1B1	0.688	0.0723	1.17e-08
RAPGEF2	0.689	0.105	2.64e-06
FLII	0.694	0.0705	6.82e-09
TLE3	0.695	0.164	0.000444
SLC3A2	0.7	0.0995	1.06e-06
WDR19	0.702	0.116	8.23e-06
RBL2	0.703	0.0809	4.82e-08
ECI1	0.707	0.0558	1.03e-10
GSTZ1	0.721	0.0665	1.43e-09
SALL4	0.726	0.0967	4.19e-07
AKT1	0.745	0.168	0.000282
CTNNB1	0.747	0.0763	7.32e-09
KRAS	0.748	0.0597	1.25e-10
VCP	0.751	0.0687	1.22e-09
MAPKAPK2	0.754	0.101	4.3e-07
ADAM10	0.757	0.0748	4.32e-09
SOCS6	0.773	0.0528	8.31e-12
VPS29	0.773	0.0733	2.22e-09
EPB41L5	0.793	0.105	4.06e-07
HEG1	0.797	0.201	0.000816
FNTA	0.797	0.0681	3.93e-10
TYK2	0.801	0.141	1.79e-05
TSG101	0.802	0.0796	4.64e-09
RASA1	0.808	0.0949	6.58e-08
TLN1	0.842	0.0657	8.42e-11
PIK3CA	0.845	0.0919	1.97e-08
TOMM20	0.846	0.0563	5.43e-12
AKT2	0.849	0.0925	2.06e-08
MAP1LC3B	0.858	0.0905	1.24e-08
GNB2	0.86	0.0706	2.01e-10
AKT3	0.862	0.0903	1.1e-08
PCCA	0.864	0.0919	1.39e-08
MAPK7	0.865	0.0883	7.39e-09
EXT1	0.866	0.0958	2.59e-08
RNF8	0.89	0.0924	9.59e-09
ILK	0.891	0.0723	1.64e-10
ARHGAP10	0.893	0.181	9.16e-05
YAP1	0.898	0.0791	6.63e-10
GJA1	0.913	0.0881	2.94e-09
PHF2	0.913	0.124	5.53e-07
NISCH	0.917	0.0901	3.91e-09
PRKAR1A	0.92	0.0727	1.06e-10
PRKAG2	0.931	0.156	9.39e-06
MAPK3	0.938	0.0714	5.43e-11
PYCR2	0.95	0.182	4.78e-05
TEAD1	0.965	0.0737	5.89e-11
NFE2L2	0.968	0.0724	4.09e-11
FBN2	0.98	0.248	0.000861
FER	0.992	0.077	7.63e-11
CORO1B	1.01	0.0895	7.85e-10
PDHB	1.02	0.0715	1.42e-11
PTPN13	1.03	0.119	5.49e-08
PRKCQ	1.03	0.173	9.21e-06
RRAGC	1.03	0.12	5.79e-08
JUP	1.04	0.0921	7.77e-10
SPARC	1.04	0.0934	9.56e-10
SMAD3	1.06	0.284	0.00145
SMAD2	1.06	0.0839	1.03e-10
DVL2	1.06	0.0819	6.64e-11
CCDC130	1.07	0.098	1.27e-09
CACNA2D2	1.07	0.177	8.6e-06
PAN2	1.08	0.104	2.82e-09
EGLN1	1.08	0.287	0.00133
ADAM17	1.1	0.0919	2.84e-10
ADD1	1.1	0.0778	1.56e-11
STAT1	1.1	0.161	1.64e-06
JAK2	1.11	0.133	9.44e-08
HLCS	1.11	0.149	4.76e-07
ID4	1.12	0.22	6.27e-05
PPT2	1.12	0.106	2.18e-09
CCS	1.13	0.112	4.6e-09
HDAC10	1.16	0.14	1.02e-07
SLC25A13	1.16	0.108	1.6e-09
SIRT2	1.18	0.136	4.77e-08
ACVR1	1.18	0.116	3.81e-09
STAM2	1.18	0.0993	3.09e-10
PARD3	1.18	0.109	1.5e-09
STX17	1.24	0.0864	1.26e-11
PTPN6	1.26	0.13	8.27e-09
EPCAM	1.29	0.117	1.14e-09
DAB2	1.29	0.193	2.23e-06
SLC7A5	1.3	0.139	1.57e-08
IFNGR2	1.33	0.0943	1.55e-11
IFT140	1.33	0.16	9.97e-08
CBX4	1.36	0.222	7.11e-06
CHD3	1.38	0.234	1.07e-05
SNAI1	1.39	0.141	6.55e-09
MAP2K1	1.41	0.112	1.04e-10
JUND	1.42	0.0539	2.15e-16
VIM	1.44	0.264	2.94e-05
WDTC1	1.45	0.104	1.94e-11
FZD7	1.45	0.263	2.64e-05
HDAC6	1.45	0.112	6.58e-11
ATP6V1B2	1.51	0.134	7.25e-10
SDCBP	1.51	0.102	6.36e-12
NFKB2	1.55	0.16	8.37e-09
MDK	1.56	0.182	5.88e-08
OXSM	1.56	0.219	9.41e-07
ATF3	1.57	0.181	4.98e-08
MMP14	1.7	0.124	2.5e-11
ZIC3	1.71	0.228	4.41e-07
JUN	1.71	0.21	1.29e-07
DMD	1.79	0.147	2.07e-10
SRC	1.81	0.108	7.52e-13
WNT3A	1.84	0.307	9.26e-06
RGN	1.85	0.285	3.2e-06
PRKCH	1.87	0.274	1.63e-06
CDKN1B	1.88	0.185	3.86e-09
COL4A2	1.94	0.169	5.42e-10
PIK3R1	1.94	0.227	6.13e-08
PLCG2	1.94	0.201	9.5e-09
PGM1	1.99	0.107	1.1e-13
BCAT2	2	0.201	5.86e-09
CAMK1	2.01	0.226	3.14e-08
LEPR	2.02	0.179	7.53e-10
VEGFA	2.03	0.206	6.5e-09
PMP22	2.05	0.382	3.5e-05
PIK3CB	2.05	0.161	9.22e-11
LAMB1	2.06	0.271	3.52e-07
GRAMD1B	2.13	0.257	9.65e-08
FLNB	2.13	0.175	1.93e-10
WNT3	2.14	0.368	1.33e-05
BMPR2	2.17	0.132	1.03e-12
GADD45A	2.23	0.202	1.03e-09
RHOC	2.31	0.144	1.84e-12
CAP2	2.32	0.0926	5.35e-16
MAP1LC3A	2.38	0.176	3.21e-11
PDGFRA	2.39	0.398	9e-06
IL6ST	2.44	0.189	7.27e-11
BMP4	2.58	0.287	2.96e-08
CPEB2	2.69	0.174	3.31e-12
DDIT3	2.76	0.302	2.24e-08
ITGA5	2.97	0.146	2.32e-14
KIFC3	3.03	0.173	3.59e-13
LIFR	3.05	0.211	1.12e-11
LOX	3.1	0.294	2.15e-09
NODAL	3.13	0.419	4.57e-07
COL5A1	3.14	0.126	5.4e-16
TIMP3	3.14	0.214	7.82e-12
FZD4	3.31	0.204	1.37e-12
TET2	3.33	0.285	4.21e-10
RASGRP1	3.44	0.38	2.6e-08
ADAM19	3.45	0.134	3.05e-16
AMOT	3.51	0.495	9.51e-07
TGFB1	3.67	0.173	1.14e-14
FN1	3.86	0.198	5.16e-14
CDH2	3.98	0.138	3.82e-17
OTX2	4.02	0.221	1.7e-13
PITX2	4.21	0.354	3.02e-10
COL5A2	4.31	0.139	1.02e-17
MAPK10	4.43	0.291	4.06e-12
ROR2	4.72	0.368	8.33e-11
KLF5	4.78	0.257	1.19e-13
GATA3	5.65	0.41	2.48e-11
NR0B1	6.42	0.435	7.22e-12
MIXL1	6.59	0.471	1.81e-11
FOXA2	7.38	0.465	2.04e-12
GATA4	7.86	0.499	2.34e-12
VWF	8.34	0.474	3.25e-13
EOMES	8.62	0.493	3.6e-13
GSC	8.79	0.41	8.89e-15
LHX1	9.25	0.505	1.57e-13
LEFTY2	9.63	0.422	2.8e-15
CER1	10.8	0.343	6.94e-18
GATA6	12	0.446	1.28e-16
