# Supplementary material for: Gene Expression at the Pluripotency Stage Predicts Pancreatic Endocrine Differentiation in iPSC Clones
Source: Research Square preprint supplement (doi:10.21203/rs.3.rs-8613101/v1), 2026-01-19
Supplement: Supplementary file 3 [file e21ee24e33b1da86dea2bb4b.docx]

**Flow cytometry Antibody**

| **Antibody** | **Fluorophore** | **Species** | **Company** |
| --- | --- | --- | --- |
| Oct-3/4 | Alexa Fluor-647 | Mouse | BD |
| Cxcr4 (CD184) | PE | Mouse | BD |
| Pdx1 | Alexa Fluor-488 | Mouse | BD |
| Nkx6.1 | PE | Mouse | BD |
| Insulin | Alexa Fluor-647 | Mouse | BD |
| Glucagon | BV-421 | Mouse | BD |

**Immunofluorescence Antibody**

| **Antibody** | **Reference code** | **Species** | **Company** |
| --- | --- | --- | --- |
| Oct-3/4 | NBP2-15052 | Mouse | Novus |
| SSEA-4 | AB16287 | Mouse | Abcam |
| Mouse IgG | A11001 | Goat | Thermo Fisher |
| Mouse IgG | A11003 | Goat | Thermo Fisher |
